# Supplementary material for: Identification of Eight Spliceogenic Variants in BRCA2 Exon 16 by Minigene Assays
Source: Front Genet. 2018 May 24;9:188. doi: 10.3389/fgene.2018.00188 (PMC5977032; doi:10.3389/fgene.2018.00188)
Supplement: Supplementary file 1 [file Table_1.xlsx]

## Sheet: Sheet1
Supplementary Table S1. Bioinformatics analysis of the 72 variants from the BIC and BRCA Share databases.
BIC/UMD variants1	NNSplice2	MaxEnt2	ESE Finder3	ESE HSF3	hnRNPA13
c.7618-114_7618-112delAGT			[-]SRp40 (80.78)		[-]hnRNPA1 (73.10)
c.7618-59G>T			[-]SRp55 (74.82)
c.7618[-]27T>A
c.7618[-]16T>G			[-]SRp55 (74.82)
c.7618[-]2A>T	[-] 3’SS: 0,69 →<0,4	3'ss (7.11→[-]1.24)	[-]SRp55 (83.78)		[-]hnRNPA1 (70.24)
c.7618[-]2A>G	[-] 3’SS: 0,69 →<0,4	3'ss (7.11→[-]0.83)			[-]hnRNPA1 (70.24)
c.7618[-]1G>A	[-] 3’SS: 0,69 →<0,4	3'ss (7.11→[-]1.63)	[-]SRp55 (77.06)		[-]hnRNPA1 (70.24)
c.7618[-]1G>C	[-] 3’SS: 0,69 →<0,4	3'ss (7.11→[-]0.94)	[-]SRp55 (77.06)		[-]hnRNPA1 (70.24)
c.7621T>C			[+]SF2/ASF (IgM[-]BRCA1) (80.08); [+]SF2/ASF (84.51)
c.7625C>G	[+] 3'SS (<0,4→0,94); [+] 5'SS (<0,4→0,91)	+5'ss (2.23→7.37)	[-]SRp55 (89.80)	[-]9G8 (62.28)	[+]hnRNPA1 (88.33)
c.7626G>A					[-]hnRNPA1 (69.05)
c.7627_7628insT	3'SS (0,69→0.59)		[-]SRp55 (77.06)
c.7630G>C			[+]SRp55 (74.37); [+]SC35 (78.93)		[-]hnRNPA1 (78.81)
c.7631delG			[+]SC35 (75.17)
c.7632C>T			[-]SRp55 (75.17)
c.7633G>A	3'SS (0,69→0.75)		[-]SC35 (75.17)
c.7636_7645del			[-]SC35 (75.17)	[-]Tr2B (81.02)
c.7639A>G			[+]SC35(78.12)	[+]9G8 (65.17)
c.7643A>G				[-]Tra2B (81.02)
c.7647C>A				[+]Tra2B (98.53); [+]9G8 (67.38)
c.7648A>G
c.7651A>C				[-]2 Tra2B (94.14, 81.02); [+]9G8 (62.28)
c.7654dup				[+] Tra2B (81.02)
c.7655_7658delTTAA			[-]SRp40 (81.38)
c.7658_7660delACA			[-]SRp40 (81.38)	[-] Tra2B (83.21)	[+]hnRNPA1 (76.43)
c.7659delC				[-] Tra2B (83.21)	[+]hnRNPA1 (69.53)
c.7661G>A			[-]SRp40 (81.38)	[+] Tra2B (94.14)
c.7669G>A				[+] Tra2B (85.42); [-]9G8 (67.72)	[+]hnRNPA1 (69.29)
c.7671delA				[-] 9G8 (67.72)	[-]hnRNPA1 (72.38)
c.7673_7674delAG			[-]SRp55 (84.62)		[-]hnRNPA1 (72.38)
c.7673delA				[-] 9G8 (67.72)
c.7679_7680delTT			[+]SC35 (83.65)
c.7680delT
c.7680dup
c.7681C>T					[+]hnRNPA1 (72.14)
c.7681dup
c.7683G>A			[-]SC35 (76.58)
c.7684T>C			[+] SRp40 (86.77); [-]SC35 (76.58)
c.7689delC			[-]SC35 (76.58); [-]SF2/ASF (IgM[-]BRCA1) (82.84); [-]SF2/ASF (83.40)
c.7696G>T			[-] SF2/ASF (IgM[-]BRCA1) (76.85); [-]SF2/ASF (77.34); [+]SRp55 (76.10)	[-]9G8 (62.15)
c.7704delT		5'ss ([-]29.63→8.92); 5'ss (8.92 → [-]11.56)
c.7712A>G		5'ss (2.81 → 3.35)
c.7715G>A				[+]9G8 (66.38); [+]Tra2B (81.02)
c.7719_7720insA			[+]SC35 (80.39); [-]SRp55 (74.69)
c.7721G>A			[-]SRp40 (80.96); [-]SRp55 (74.69)	[+]9G8 (61.07)	[+]hnRNPA1 (77.62)
c.7731delA			[+]SF2/ASF (72.79)	[-]Tra2B (83.21); [-]9G8(61.34)
c.7738C>T			[-]SC35 (81.01)		[+]hnRNPA1 (70.24)
c.7742T>G			[+]SRp40 (81.92); [+]SF2/ASF (IgM[-]BRCA1) (77.15); [+]SF2/ASF (76.47)		[+]hnRNPA1 (66.67)
c.7751G>A
c.7753G>A		5'ss ([+]-1.33 → 3.06)			[+]hnRNPA1 (74.05)
c.7757G>A
c.7758G>A					[-]hnRNPA1 (67.38)
c.7759C>T			[+]SRp55 (75.08)
c.7761delC			[-]SC35 (88.01); [-]SRp40 (78.80)
c.7762delA			[-]SC35 (88.01); [-]SRp40 (78.80)
c.7764A>T			[-]SRp40 (78.80)
c.7766C>A			[+]SF2/ASF (IgM[-]BRCA1) (72.31)
c.7772A>G			[+]SF2/ASF (IgM[-]BRCA1) (74.85)	[-]9G8 (60.94)	[+]hnRNPA1 (69.52)
c.7781A>G
c.7783G>C			[-]SC35 (78.49)		[-]2 hnRNPA1 (65.72; 73.81)
c.7783G>T			[-]SC35 (78.49); [+]SRp40 (81.02)	[-]9G8 (62.28)	[-]2 hnRNPA1 (65.72; 73.81)
c.7786G>A					[+]hnRNPA1 (80.24)
c.7791_7792insA				[+]Tra2B (100.00)
c.7795_7797delGAA				[-]Tra2B (100.00); [-]9G8 (87.92)
c.7795G>T
c.7802A>G			[-]SRp40 (83.89)		[-]hnRNPA1 (66.43)
c.7805G>C		5'ss (4.68→[-]2.79)	[+]SRp55 (89.80)		[-]hnRNPA1 (69.05)
c.7805+1G>A		5'ss (4.68→[-]3.50)	[-]SRp40 (83.89); [-]SC35 (82.36)
c.7805+3A>C		5'ss (4.68→[-]3.85)
c.7805+6C>G		5'ss (4.68→5.90)
c.7805+7T>A			[+]SRp40 (84.01)		[-]hnRNPA1 (70.72)
c.7805+8A>G					[-]hnRNPA1 (70.72)
1 Selected variants are shown in bold type 2 Bioinformatics: [+] and [-] symbols indicate creation or disruption of splicing motifs, respectively. Thresholds of the splicing programs: Splice Sites (ss): NNSPLICE (values 0-1): Cut-offs=0.4 for both 5’ and 3’ splice sites (ss disruption <0.4, ss creation >0.4) ; MaxEnt: 3.0 for 5’ and 3’ splice sites (variation threshold ±30% according to HSF). 3 E…
